# Supplementary material for: Evaluation of the Environmental Performance of Adsorbent Materials Prepared from Agave Bagasse for Water Remediation: Solid Waste Management Proposal of the Tequila Industry
Source: MDPI journal article supplement (doi:10.3390/ma16010008), 2022-12-20
Supplement: s1 [file s1]

---

*Article*

# Evaluation of environmental performance of adsorbent materials prepared from agave bagasse for water remediation: Solid waste management proposal of the Tequila Industry

Camila S. Gómez-Navarro <sup>1</sup>, Walter M. Warren-Vega <sup>1</sup>, Juan C. Serna-Carrizales <sup>2</sup>, Ana I. Zárate-Guzmán <sup>1,2,\*</sup>, Raúl Ocampo-Pérez <sup>2</sup>, Francisco Carrasco-Marín <sup>3</sup>, Virginia H. Collins-Martínez <sup>4</sup>, Joaquina Niembro-García <sup>5</sup>, Luis A. Romero-Cano <sup>1,\*</sup>

<sup>1</sup> Grupo de Investigación en Materiales y Fenómenos de Superficie. Departamento de Biotecnológicas y Ambientales, Universidad Autónoma de Guadalajara, Av. Patria 1201, C.P. 45129 Zapopan, Jalisco, Mexico

<sup>2</sup> Centro de Investigación y Estudios de Posgrado, Facultad de Ciencias Químicas, Universidad Autónoma de San Luis Potosí, San Luis Potosí 78260, Mexico

<sup>3</sup> Grupo de Investigación en Materiales de Carbón, Facultad de Ciencias, Universidad de Granada, Av. Fuente Nueva s/n, Granada C.P. 18071, Spain

<sup>4</sup> Centro de Investigación en Materiales Avanzados (CIMAV), S.C. Miguel de Cervantes #120, Complejo Industrial Chihuahua, Chihuahua, Chih., 31136 Mexico

<sup>5</sup> Facultad de ingeniería, Universidad Panamericana, Augusto Rodin 498, Ciudad de Mexico, 03920, Mexico

\* Correspondence: A.I.Z.-G. (aizg\_08@hotmail.com); L.A.R.-C. (luis.cano@edu.uag.mx)

## SUPPLEMENTARY MATERIAL

---

**Table S1.** General characteristics of Direct Blue 86.

|                                |                                                                                      |
|--------------------------------|--------------------------------------------------------------------------------------|
| Chemical structure             | 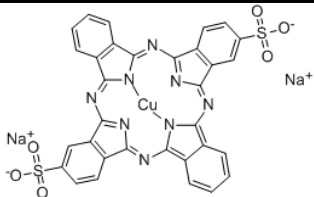  |
| Colour Index Number            | 74180                                                                                |
| Molecular weight               | 780.16 g/mol                                                                         |
| Chemical formula               | C <sub>32</sub> H <sub>14</sub> CuNa <sub>2</sub> O <sub>6</sub> S <sub>2</sub>      |
| $\lambda_{\max}$ (nm)          | 628 and 662 nm                                                                       |
| UV-Vis spectra at different pH |  |

**Table S2.** Mathematical models used to describe the adsorption process in batch and fixed bed.

| Mathematical model  | Equation                                              | Parameters                                                                                                                                                                                                                               |
|---------------------|-------------------------------------------------------|------------------------------------------------------------------------------------------------------------------------------------------------------------------------------------------------------------------------------------------|
| Mass Balance        | $q_e = (C_o - C_e) \frac{V}{W}$                       | $C_o$ and $C_e$ are the initial and equilibrium concentrations respectively (mg L <sup>-1</sup> ), $V$ is the volume of solution (L) and $W$ is the mass of adsorbent employed (g).                                                      |
| Pseudo-first order  | $q_t = q_e(1 - e^{-k_1 t})$                           | $q_e$ (mmol g <sup>-1</sup> ) and $q_t$ (mmol g <sup>-1</sup> ) are the amounts of adsorbed adsorbate at equilibrium and at time $t$ , respectively, and $k_1$ (h <sup>-1</sup> ) is the rate constant of pseudo-first-order adsorption. |
| Pseudo-second order | $q_t = \frac{t}{\frac{1}{k_2 q_e^2} + \frac{t}{q_e}}$ | $k_2$ (g mmol <sup>-1</sup> h <sup>-1</sup> ) is the equilibrium rate constant of pseudo-second-order adsorption.                                                                                                                        |
| Elovich             | $q_t = \frac{2.3}{\alpha} * \log(1 + \alpha \beta t)$ | $\alpha$ (mmol g <sup>-1</sup> min <sup>-1</sup> ) is the initial sorption rate, and the parameter $\beta$ (g mmol <sup>-1</sup> ) is related to the extent of surface coverage and activation energy for chemisorption.                 |

|              |                                                                                       |                                                                                                                                                                                                                                                                               |
|--------------|---------------------------------------------------------------------------------------|-------------------------------------------------------------------------------------------------------------------------------------------------------------------------------------------------------------------------------------------------------------------------------|
| Langmuir     | $q_e = \frac{q_{\max} K C_e}{1 + K C_e}$                                              | $q_{\max}$ is the maximum adsorption capacity of the biosorbent and $K$ is the Langmuir constant indicating affinity for the active site.                                                                                                                                     |
| Freundlich   | $q_e = K_f C_e^{1/n}$                                                                 | $K_f$ is the Freundlich constant and $1/n$ is the heterogeneity factor.                                                                                                                                                                                                       |
| Temkin       | $q_e = \left(\frac{RT}{b_T}\right) \ln(A_T C_e)$                                      | $b_T$ (J/mol) is the Temkin constant related to the variation of adsorption energy, and $A_T$ (L/mg) is the equilibrium constant of the Temkin model. $R$ was the gas constant (8.314 J/mol·K), and $T$ was the absolute temperature (K).                                     |
| Adams-Bohart | $\frac{C}{C_0} = e^{K_{AB} C_0 t - \frac{K_{AB} N_0 Z}{v}}$                           | $K_{AB}$ is the Adams-Bohart kinetic constant (L mg <sup>-1</sup> min <sup>-1</sup> ), $N_0$ is the sorption capacity per unit volume of the bed (mg L <sup>-1</sup> ), $Z$ is the length of the column bed (cm) and $v$ is the linear flow velocity (cm min <sup>-1</sup> ). |
| Thomas       | $\frac{C}{C_0} = \frac{1}{1 + \exp\left(\frac{K_{Th}}{Q}(q_0 m - C_0 V_{ef})\right)}$ | $K_{Th}$ is the Thomas rate (mL min <sup>-1</sup> mg <sup>-1</sup> ) and $q_0$ corresponds to the maximum concentration of the solute in the solid phase (mg g <sup>-1</sup> ).                                                                                               |

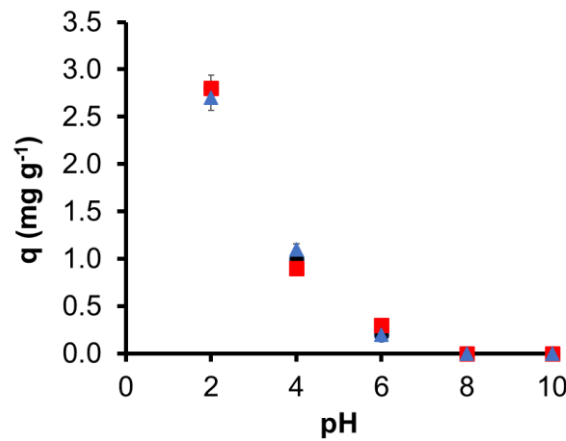

**Figure S1.** Effect of adsorption capacity as a function of pH in solution: ● 25 °C, ■ 35 °C, ▲ 45 °C.

### Characterization of hydrochar prepared from agave bagasse

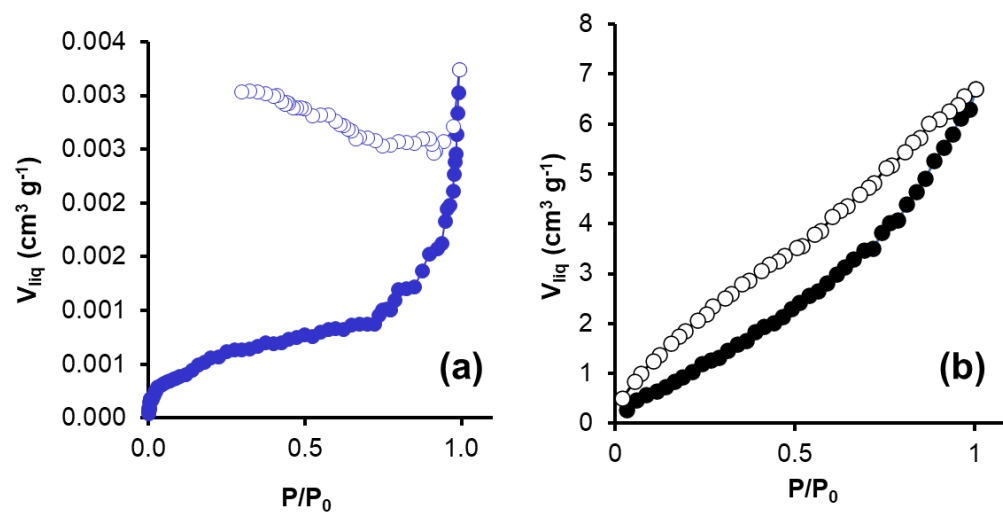

**Figure S2.** Nitrogen adsorption isotherms at  $-196\text{ }^{\circ}\text{C}$  for: (a) biosorbent and (b) hydrochar.

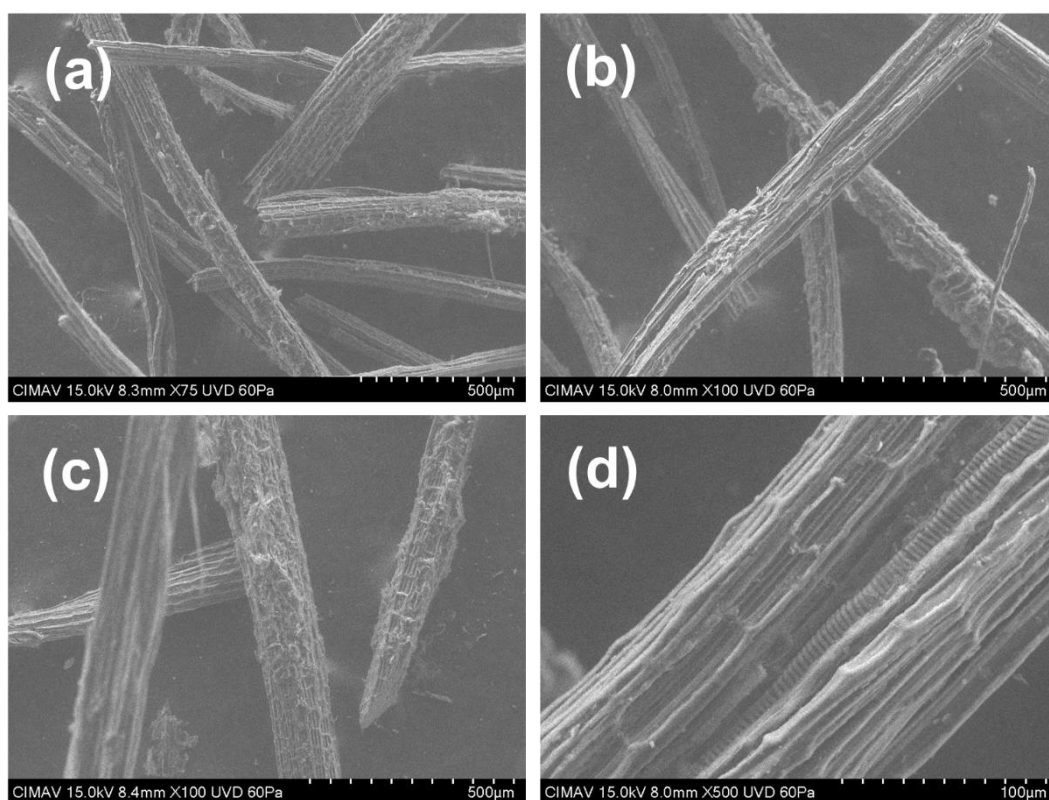

**Figure S3.** Microphotographs of the hydrochar prepared from agave bagasse at different magnifications.

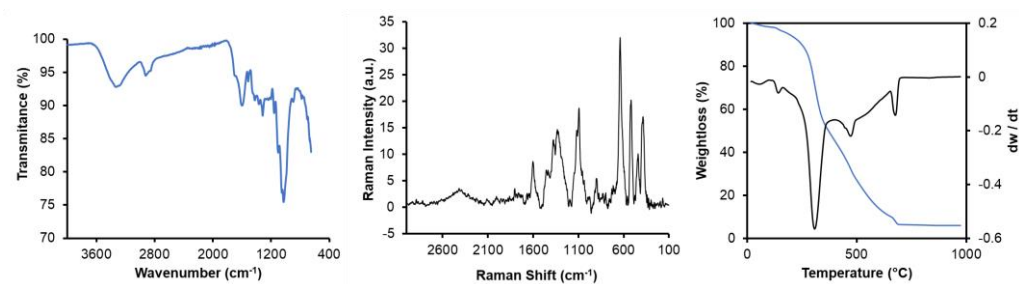

**Figure S4.** a) FTIR spectrum, b) RAMAN spectrum, and c) Thermogravimetric analysis of hydrochar prepared from agave bagasse.

### Lyfe-cycle assessment of adsorbent materials prepared from agave bagasse

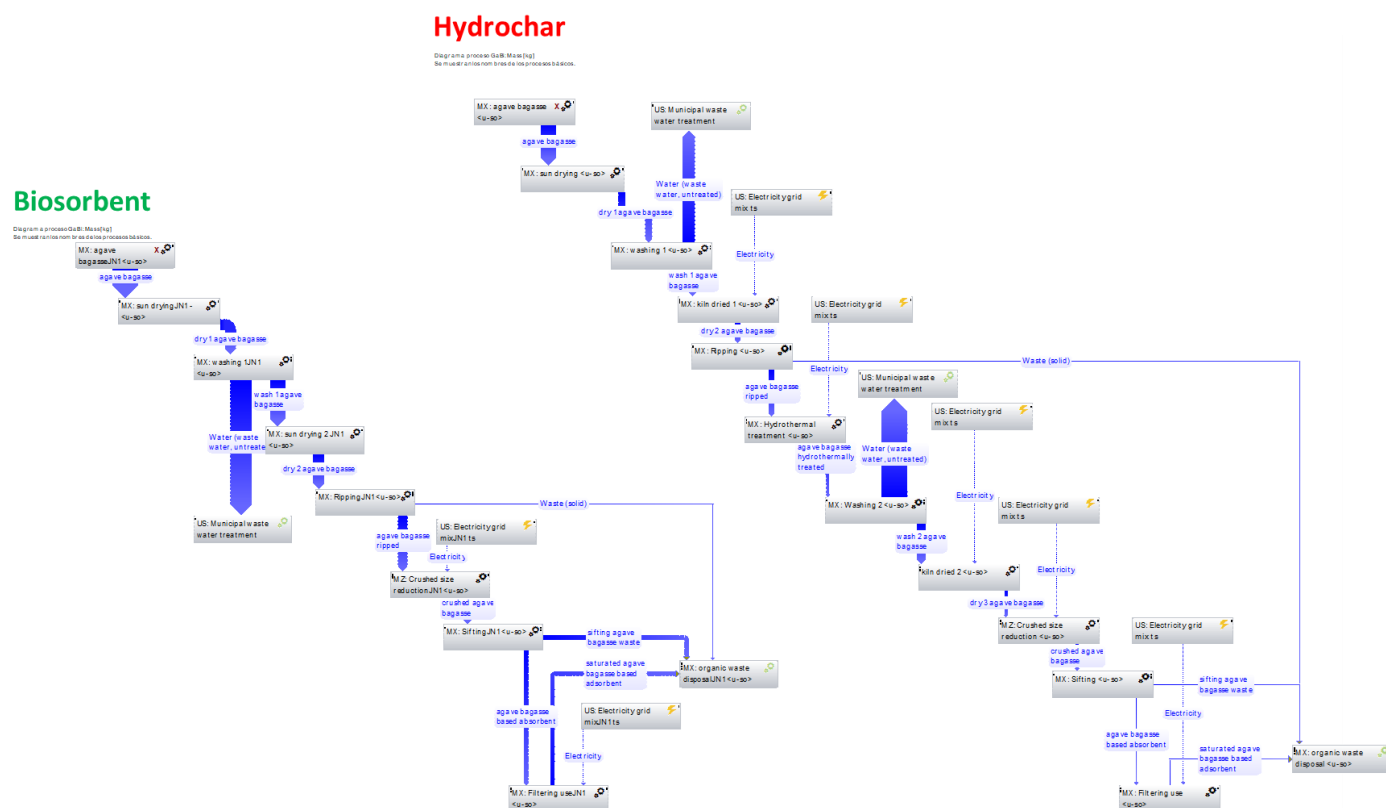

**Figure S5.** Diagrams created in the GaBi software for the life cycle impact assessment of both adsorbents.
